# Supplementary material for: Solid state fermentation of Moringa oleifera leaf meal by mixed strains for the protein enrichment and the improvement of nutritional value
Source: PeerJ. 2020 Nov 18;8:e10358. doi: 10.7717/peerj.10358 (PMC7680055; doi:10.7717/peerj.10358)
Supplement: Supplemental Information 2 [file peerj-08-10358-s002.xlsx]

## Sheet: Sheet1
Independent variable: initial moisture content(%)
dependent variable: true protein(%)								factor-initial moisture content			Mean difference (I-J)	Std.Error	sig.	95% confidence interval
The ANOVA Procedure														down	up
Source	Sum of Squares	DF	Mean Square	F Value	Pr＞F			LSD	30	40	-0.346667	0.214094	0.144058	-0.840368	0.147034
Model	17.793	4	4.448	64.696	0.0003					50	-2.29833*	0.239364	1.14867e-05	-2.85031	-1.74636
Error	0.55	8	0.069							60	-3.29833*	0.239364	7.42656e-07	-3.85031	-2.74636
Corrected Total	18.343	12								70	-1.04333*	0.214094	0.00123486	-1.53703	-0.549632
									40	30	0.346667	0.214094	0.144058	-0.147034	0.840368
Independent variable		N	Alpha 0.05							50	-1.95167*	0.239364	3.80732e-05	-2.50364	-1.39969
			1	2	3	4				60	-2.95167*	0.239364	1.74162e-06	-3.50364	-2.39969
S-N-Ka,	30	3	23.8867							70	-.69667*	0.214094	0.0116308	-1.19037	-0.202966
	40	3	24.2333						50	30	2.29833*	0.239364	1.14867e-05	1.74636	2.85031
	70	3		24.93						40	1.95167*	0.239364	3.80732e-05	1.39969	2.50364
	50	3			26.185					60	-1.00000*	0.26221	0.00513527	-1.60466	-0.395342
	60	3				27.185				70	1.25500*	0.239364	0.000780384	0.703026	1.80697
	Significance		0.177624	1	1	1			60	30	3.29833*	0.239364	7.42656e-07	2.74636	3.85031
										40	2.95167*	0.239364	1.74162e-06	2.39969	3.50364
Independent variable: inoculation size (%)										50	1.00000*	0.26221	0.00513527	0.395342	1.60466
dependent variable: true protein(%)										70	2.25500*	0.239364	1.32277e-05	1.70303	2.80697
The ANOVA Procedure									70	30	1.04333*	0.214094	0.00123486	0.549632	1.53703
Source	Sum of Squares	DF	Mean Square	F Value	Pr＞F					40	.69667*	0.214094	0.0116308	0.202966	1.19037
Model	393.923	5	78.7846	5.35124	0.00814299					50	-1.25500*	0.239364	0.000780384	-1.80697	-0.703026
Error	176.672	12	14.7227							60	-2.25500*	0.239364	1.32277e-05	-2.80697	-1.70303
Corrected Total	570.595	17
								factor-fermentation temperature			Mean difference (I-J)	Std.Error	sig.	95% confidence interval
Independent variable		N	Alpha 0.05											down	up
			1	2				LSD	24	27	-1.41333*	0.535118	0.0246847	-2.60565	-0.221016
S-N-Ka	8.0	3	17.1719							30	-4.44667*	0.535118	8.42977e-06	-5.63898	-3.25435
	12.0	3	19.818	19.818						33	-6.41000*	0.535118	2.97069e-07	-7.60232	-5.21768
	20.0	3	24.3445	24.3445						36	-3.83000*	0.535118	3.078e-05	-5.02232	-2.63768
	24.0	3	26.1086	26.1086					27	24	1.41333*	0.535118	0.0246847	0.221016	2.60565
	16.0	3		28.6993						30	-3.03333*	0.535118	0.000207088	-4.22565	-1.84102
	Significance		0.154	0.0814395						33	-4.99667*	0.535118	2.96839e-06	-6.18898	-3.80435
										36	-2.41667*	0.535118	0.00111497	-3.60898	-1.22435
									30	24	4.44667*	0.535118	8.42977e-06	3.25435	5.63898
Independent variable: inoculation ratio of A. niger, C. utilis and B. subtilis										27	3.03333*	0.535118	0.000207088	1.84102	4.22565
dependent variable: true protein(%)										33	-1.96333*	0.535118	0.00432445	-3.15565	-0.771016
The ANOVA Procedure										36	0.616667	0.535118	0.275963	-0.57565	1.80898
Source	Sum of Squares	DF	Mean Square	F Value	Pr＞F				33	24	6.41000*	0.535118	2.97069e-07	5.21768	7.60232
Model	14.929	4	4.97633	1.89634	0.208682					27	4.99667*	0.535118	2.96839e-06	3.80435	6.18898
Error	20.9934	8	2.62417							30	1.96333*	0.535118	0.00432445	0.771016	3.15565
Corrected Total	35.9224	11								36	2.58000*	0.535118	0.000700788	1.38768	3.77232
									36	24	3.83000*	0.535118	3.078e-05	2.63768	5.02232
Independent variable		N	Alpha 0.05							27	2.41667*	0.535118	0.00111497	1.22435	3.60898
			1	2						30	-0.616667	0.535118	0.275963	-1.80898	0.57565
S-N-Ka	1:2:1	3	24.9499							33	-2.58000*	0.535118	0.000700788	-3.77232	-1.38768
	1:1:1	3	26.8905	26.8905
	2:1:1	3		27.41
	1:1:2	3		28.2288
	Significance		0.195	0.15
Independent variable: fermentation temperature (ºC)
dependent variable: true protein(%)
The ANOVA Procedure
Source	Sum of Squares	DF	Mean Square	F Value	Pr＞F
Model	77.0561	4	19.264	44.8494	2.35362e-06
Error	4.29527	10	0.429527
Corrected Total	81.3513	14
Independent variable		N	Alpha 0.05
			1	2	3	4
S-N-Ka	24	3	18.3167
	27	3		19.73
	36	3			22.1467
	30	3			22.7633
	33	3				24.7267
	Significance		1	1	0.275963	1

## Sheet: Sheet2
Inoculation orders of MOLM
Treatments	6 d	7 d	8 d	9 d	10 d
T1	24.4725	27.8947	17.3827	16.5949	17.5201
T2	33.2545	31.1778	17.1594	17.2792	17.628
T3	29.8759	28.0173	21.505	16.4278	16.944
T4	29.0505	21.0377	17.4099	16.961	18.8171
T5	35.128	30.3447	18.979	16.997	19.2327
T6	25.8031	31.7948	22.3907	17.056	19.7638
T7	32.6378	18.8341	16.9668	16.2142	18.9492
T8	21.7616	19.5678	17.2795	17.9106	18.0055
T9	28.4949	23.0271	19.2348	16.096	20.3579
Inoculation ratio of A. niger, C. utilis and B. subtilis	True protein (%)			Mean
1:1:1	26.1294	27.5468	26.9955	26.8905
1:2:1	24.96	24.0356	25.8641	24.9532
1:1:2	29.3997	27.6038	27.6828	28.2288
2:1:1	27.4023	27.7031	27.1168	27.4074
Inoculation size (%)	True protein (%)			Mean
8	16.1697	17.1484	18.1974	17.1719
12	23.0187	16.1885	20.2468	19.818
16	32.9676	25.3136	24.7325	27.6712
20	23.7126	24.865	26.0183	24.8653
24	23.2427	21.5505	22.3951	22.3961
Fermentation temperature (ºC)	True protein (%)			Mean
24	18.5957	18.25	18.1004	18.3154
27	20.107	20.128	18.9504	19.7285
30	22.63	22.65	23.01	22.7633
33	25.39	24.99	23.8	24.7267
36	22.79	22.59	21.06	22.1467
Initial moisture content (%)	True protein (%)			Mean
30	24.1317	23.5941	23.9369	23.8875
40	24.3726	23.9352	24.3929	24.2336
50	26.2627	26.1058	26.165	26.1778
60	27.3112	27.0579	27.171	27.18
70	24.742	24.729	25.3203	24.9305
Verification experiment	True protein (%)			Mean
under the optimal condition	28.2823	28.0132	28.818	28.3712
