# Supplementary material for: Solid state fermentation of Moringa oleifera leaf meal by mixed strains for the protein enrichment and the improvement of nutritional value
Source: PeerJ. 2020 Nov 18;8:e10358. doi: 10.7717/peerj.10358 (PMC7680055; doi:10.7717/peerj.10358)
Supplement: Supplemental Information 3 [file peerj-08-10358-s003.xlsx]

## Sheet: Sheet1
Inoculation orders of MOLM
Treatments	6 d	7 d	8 d	9 d	10 d
T1	24.4725	27.8947	17.3827	16.5949	17.5201
T2	33.2545	31.1778	17.1594	17.2792	17.628
T3	29.8759	28.0173	21.505	16.4278	16.944
T4	29.0505	21.0377	17.4099	16.961	18.8171
T5	35.128	30.3447	18.979	16.997	19.2327
T6	25.8031	31.7948	22.3907	17.056	19.7638
T7	32.6378	18.8341	16.9668	16.2142	18.9492
T8	21.7616	19.5678	17.2795	17.9106	18.0055
T9	28.4949	23.0271	19.2348	16.096	20.3579
Inoculation ratio of A. niger, C. utilis and B. subtilis	True protein (%)			Mean
1:1:1	26.1294	27.5468	26.9955	26.8905
1:2:1	24.96	24.0356	25.8641	24.9532
1:1:2	29.3997	27.6038	27.6828	28.2288
2:1:1	27.4023	27.7031	27.1168	27.4074
Inoculation size (%)	True protein (%)			Mean
8	16.1697	17.1484	18.1974	17.1719
12	23.0187	16.1885	20.2468	19.818
16	32.9676	25.3136	24.7325	27.6712
20	23.7126	24.865	26.0183	24.8653
24	23.2427	21.5505	22.3951	22.3961
Fermentation temperature (ºC)	True protein (%)			Mean
24	18.5957	18.25	18.1004	18.3154
27	20.107	20.128	18.9504	19.7285
30	22.63	22.65	23.01	22.7633
33	25.39	24.99	23.8	24.7267
36	22.79	22.59	21.06	22.1467
Initial moisture content (%)	True protein (%)			Mean
30	24.1317	23.5941	23.9369	23.8875
40	24.3726	23.9352	24.3929	24.2336
50	26.2627	26.1058	26.165	26.1778
60	27.3112	27.0579	27.171	27.18
70	24.742	24.729	25.3203	24.9305
Verification experiment	True protein (%)			Mean
under the optimal condition	28.2823	28.0132	28.818	28.3712

## Sheet: Sheet2
Nutrient composition of fermented Moringa oleifera leaf meal (FMOLM) and unfermented Moringa oleifera leaf meal(MOLM), as DM basis
Item	MOLM-1	MOLM-2	MOLM-3	Mean	FMOLM-1	FMOLM-2	FMOLM-3	Mean
CP, %	21.1521	21.9948	20.22	21.1223	31.1279	29.7403	29.713	30.1937
TCP-SP, %	5.42739	5.0542	5.70762	5.3964	6.48131	6.54071	6.61788	6.54663
Small peptide, %	—	—	—	—	—	—	—	—
NDF, %	48.4152	53.0096	53.443	51.6226	55.7905	58.1111	58.0609	57.3208
ADF, %	35.6125	39.0313	39.1542	37.9327	28.1706	28.4377	48.2337	34.9473
Hemicellulose, %	—	—	—	—	—	—	—	—
Cellulose, %	—	—	—	—	—	—	—	—
Lignin, %	10.0911	10.391	10.841	10.441	9.29811	10.6669	11.6844	10.5498
CF, %	27.3499	27.1616	27.5412	27.3509	25.1373	25.2019	25.163	25.1674
EE, %	4.61	4.76	4.67	4.68	4.23	4.72	4.31	4.42
Ash, %	8.09197	7.99429	8.05	8.04542	10.1131	10.1454	10.1323	10.1303
Ca, %	0.8981	0.868564	0.922312	0.896325	1.14163	1.14055	1.14122	1.14113
P, %	0.213478	0.214525	0.221213	0.216406	0.294023	0.287561	0.28835	0.289978
IVPD, %	42.739	42.6531	43.1917	42.8613	62.8042	66.4416	65.9091	65.0516
Total sugar, %	13.8536	13.5581	12.81	13.4072	7.61484	8.27994	5.67968	7.19149
Reducing sugar, %	0.903456	0.863746	0.874343	0.880515	0.212334	0.172343	0.198342	0.19434
Tannin, mg/g	7.17996	8.41635	9.56068	8.38566	3.41941	3.05985	4.4121	3.63045
Phytic acid, %	5.99644	5.89191	5.93443	5.94093	3.61549	3.60662	3.62123	3.61445
Indispensable AA, %
Arg	0.7184	0.6445	0.729	0.6973	0.803123	0.689284	0.761	0.751136
His	0.203924	0.280545	0.231323	0.238597	0.34518	0.229725	0.281224	0.285377
Ile	0.423433	0.559891	0.489322	0.490882	0.704577	0.592353	0.641	0.645977
Leu	0.974823	1.30649	1.129	1.13677	1.58945	1.1636	1.39223	1.38176
Lys	0.580708	0.730572	0.671242	0.660841	0.686807	0.483791	0.612323	0.594307
Phe	0.553896	0.824523	0.702332	0.693584	1.03953	0.658589	0.844232	0.847449
Thr	0.59564	0.734087	0.693234	0.674321	0.913457	0.694437	0.834122	0.814006
Val	0.597384	0.746158	0.66323	0.668924	0.932149	0.783845	0.87212	0.862705
Trp	0.313434	0.393473	0.292343	0.333084	0.447824	0.423342	0.413342	0.42817
Dispensable AA, %
Ala	0.872262	0.962071	0.91123	0.915187	1.1706	0.971998	1.07722	1.07327
Asp	1.2751	1.5103	1.37343	1.38628	1.81195	1.41971	1.63623	1.62263
Cys	0.0614714	0.0729155	0.0712231	0.0685367	0.0934841	0.0674206	0.0744342	0.0784463
Glu	1.34398	1.99172	1.68123	1.67231	2.28293	1.41271	1.84545	1.84703
Gly	0.664414	0.904305	0.764332	0.777684	1.10339	0.610092	0.835679	0.849721
Pro	0.627575	0.667902	0.662323	0.6526	0.796123	0.758104	0.793434	0.782554
Ser	0.595858	0.76079	0.691313	0.682654	0.973829	0.662574	0.8145	0.816968
Tyr	0.300272	0.435313	0.374143	0.36991	0.544103	0.364567	0.433331	0.447334
